# Supplementary material for: Rocks Really Rock: electronic field trips via Web Google Earth can generate positive impacts in attitudes toward Earth sciences in middle- and high-school students
Source: Copernicus journal article supplement (doi:10.5194/gc-7-101-2024), 2024-05-02
Supplement: Supplementary file 1 [file gc-7-101-2024-supplement.zip]

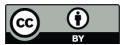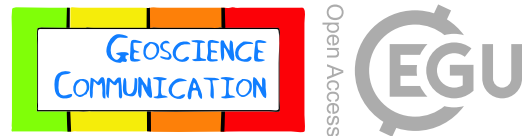

## *Supplement of*

# **Rocks Really Rock: electronic field trips via Web Google Earth can generate positive impacts in attitudes toward Earth sciences in middle- and high-school students**

**Carolina Ortiz-Guerrero and Jamie Loizzo**

*Correspondence to:* Carolina Ortiz-Guerrero (cog790@gmail.com)

- gc-7-101-2024-supplement-title-page.pdf
- S1. Students Survey.docx
- S2. Valid survey Answers.xlsx
- S3. Teachers Survey.docx
- S4. Valid teachers survey answers.xlsx

The copyright of individual parts of the supplement might differ from the article licence.
