# Supplementary material for: Rocks Really Rock: electronic field trips via Web Google Earth can generate positive impacts in attitudes toward Earth sciences in middle- and high-school students
Source: Copernicus journal article supplement (doi:10.5194/gc-7-101-2024), 2024-05-02
Supplement: Supplementary file 1 [file S1. Students Survey.docx]

Supplementary Material-Survey

Intro Youth Assent "Rocks Really Rock" Streaming Science Electronic Field Trip

We want to invite you to take part in a study to better understand how students like you learn through an electronic field trip. You are being asked because you are participating in 'Rocks Really Rock' Electronic Field Trip at your school / after school program, or you have already participated in the field trip. Your parents received information about your opportunity to participate in this research last week.

We want to hear your opinions and learn from you about this fun and interactive field trip. To participate you will complete a survey after the program. Your participation will be confidential. Your grade in this class or any other class will not be affected in any way by choosing to take the survey or not to take the survey.

Even if you choose not to participate in this research, you can still participate in the presentation and activities. You do not have to be in this study if you do not want to, and you may stop participating at any time.

If you have a question at any time, please ask the teacher or other adult in your classroom.

Investigator Information:Carolina Ortiz Guerrero, PhD Student in the Department of Geological Sciences at the University of Florida, [cortizguerrero@ufl.edu](mailto:cortizguerrero@ufl.edu) (352) 2782857, Williamson Hall 216

Do you agree to participate in this research?

- YES (4)
- NO (5)

Survey C-1.

1 Q1 Please indicate your agreement with the next statement in a scale of 1 to 5.

BEFORE the ‘Rocks really rock’ electronic field trip, I thought Geology was

|  | 1 | 2 | 3 | 4 | 5 |  |  |
| --- | --- | --- | --- | --- | --- | --- | --- |
|  | 1 (1) | 2 (2) | 3 (3) | 4 (4) | 5 (5) | 6 (6) |  |
| Unappealing |  |  |  |  |  |  | Appealing |
| Mundane |  |  |  |  |  |  | Fascinating |
| Unexciting |  |  |  |  |  |  | Exciting |

Q22 Please indicate your agreement with the next statement in a scale of 1 to 5.

AFTER the ‘Rocks really rock’ electronic field trip, I think Geology is

|  | 1 | 2 | 3 | 4 | 5 |  |  |
| --- | --- | --- | --- | --- | --- | --- | --- |
|  | 1 (1) | 2 (2) | 3 (3) | 4 (4) | 5 (5) | 6 (6) |  |
| Unappealing |  |  |  |  |  |  | Appealing |
| Mundane |  |  |  |  |  |  | Fascinating |
| Unexciting |  |  |  |  |  |  | Exciting |

Survey C-1. Continued

2-Q1 Please indicate your level of agreement with the following statements:

|  | BEFORE participating in the Rock’s really Rock EFT, I thought... | | | | | AFTER participating in the Rock’s really Rock EFT, I now think... | | | | |
| --- | --- | --- | --- | --- | --- | --- | --- | --- | --- | --- |
|  | Strongly Agree (1) | Agree (2) | Neutral (3) | Disagree (4) | Strongly Disagree (5) | Strongly Agree (1) | Agree (2) | Neutral (3) | Disagree (4) | Strongly Disagree (5) |
| Geologists can work outdoors |  |  |  |  |  |  |  |  |  |  |
| Geology is a science |  |  |  |  |  |  |  |  |  |  |
| Geology is important |  |  |  |  |  |  |  |  |  |  |
| A job as geologist would be interesting |  |  |  |  |  |  |  |  |  |  |
| I would consider geology as a major |  |  |  |  |  |  |  |  |  |  |

2-Q1 Please indicate your level of agreement with the following statements:

|  | BEFORE participating in the Rock’s really Rock EFT, I thought... | | | | | AFTER participating in the Rock’s really Rock EFT, I now think... | | | | |
| --- | --- | --- | --- | --- | --- | --- | --- | --- | --- | --- |
|  | Strongly Agree (1) | Agree (2) | Neutral (3) | Disagree (4) | Strongly Disagree (5) | Strongly Agree (1) | Agree (2) | Neutral (3) | Disagree (4) | Strongly Disagree (5) |
| I would like to learn more about geology (3) |  |  |  |  |  |  |  |  |  |  |
| I have a great deal of knowledge about geology (5) |  |  |  |  |  |  |  |  |  |  |

3-Q1 BEFORE the Electronic Field Trip How much did you know about rocks?

|  | Nothing (1) | Not much (2) | A Little (3) | A lot (4) | Everything (9) |
| --- | --- | --- | --- | --- | --- |
| - (13) |  |  |  |  |  |

3-Q2 AFTER the Electronic Field Trip How much do you know about rocks?

|  | Nothing (1) | Not much (2) | A Little (3) | A lot (4) | Everything (9) |
| --- | --- | --- | --- | --- | --- |
| - (13) |  |  |  |  |  |

Demographics

What is your gender?

- Male
- Non-binary
- Female
- Prefer not to say
- Prefer to self describe (_____)

What grade are you in? (select one)

- - - - 5
      - 6
      - 7
      - 8
      - 9
      - 10
      - 11
      - 12
