# Supplementary material for: Rocks Really Rock: electronic field trips via Web Google Earth can generate positive impacts in attitudes toward Earth sciences in middle- and high-school students
Source: Copernicus journal article supplement (doi:10.5194/gc-7-101-2024), 2024-05-02
Supplement: Supplementary file 2 [file S2. Valid survey Answers.xlsx]

## Sheet: Sheet1
Response ID	1 Q1_1 Indicate your agreement with the next statement in the scale of 1 to 5 BEFORE UNAPPEALING APPEALING	1 Q1_2 Indicate your agreement with the next statement in the scale of 1 to 5 BEFORE MUNDANE FASCINATING	1Q1_4 Indicate your agreement with the next statement in the scale of 1 to 5 BEFORE Unexciting exciting	1-Q2_1 Indicate your agreement with the next statement in the scale of 1 to 5 AFTER UNAPPEALING APPEALING	1-Q2_2 Indicate your agreement with the next statement in the scale of 1 to 5 AFTER MUNDANE FASCINATING	1-Q2_4 Indicate your agreement with the next statement in the scale of 1 to 5 AFTER UNEXCITING EXCITING	2Q1-1 Before Geologists can work outdoors	2Q1-2 Before Geology is a science	2Q1-3 Before Geology is important	2Q1-4 Before I would like to learn more about geology	2Q1-5 Before I have a great deal of knowledge about geology	2Q1-6 Before A job as geologist would be interesting	2Q1-7 Before I would consider geology as a major	2Q1-21 After Geologists can work outdoors	2Q1-22 After Geology is a science	2Q1-23 After Geology is important	2Q1-24 After I would like to learn more about geology	2Q1-25 After I have a great deal of knowledge about geology	2Q1-26 After A job as geologist would be interesting	2Q1-27 After I would consider geology as a major	3Q1-1 BEFORE the Electronic Field Trip How much did you know about rocks?	3Q2-1 AFTER the Electronic Field Trip How much do you know about rocks?	Q4 What grade are you in (select one)?	5-Q1 Demographic Selected choice	5-Q4 What grade are you in (select one)?
Student 1	3	3	3	3	3	3	Strongly Disagree	Strongly Disagree	Strongly Disagree	Strongly Disagree	Strongly Disagree	Strongly Disagree	Strongly Disagree	Strongly Agree	Strongly Agree	Strongly Agree	Strongly Agree	Strongly Agree	Strongly Agree	Strongly Agree	Not much	Not much	12	Male	12
Student 2	3	2	4	3	2	4	Strongly Agree	Strongly Agree	Agree	Neutral	Strongly Disagree	Disagree	Strongly Disagree	Strongly Agree	Strongly Agree	Strongly Agree	Neutral	Neutral	Disagree	Disagree	A Little	A lot	8	Female	8
Student 3	3	4	5	4	4	5	Neutral	Neutral	Neutral	Neutral	Neutral	Neutral	Neutral	Agree	Agree	Agree	Neutral	Neutral	Neutral	Neutral	A Little		8	Male	8
Student 4	3	3	3	2	2	2	Strongly Agree	Strongly Agree	Agree	Strongly Disagree	Neutral	Strongly Disagree	Strongly Disagree	Strongly Agree	Strongly Agree	Agree	Strongly Disagree	Neutral	Strongly Disagree	Strongly Disagree	A Little	A Little	8	Female	8
Student 5	3	3	3	4	4	5	Strongly Agree	Strongly Agree	Strongly Agree	Agree	Disagree	Disagree	Neutral	Strongly Agree	Strongly Agree	Strongly Agree	Agree	Neutral	Neutral	Neutral	A Little	A lot	8	Female	8
Student 6	1	1	1	1	1	1	Agree	Agree	Disagree	Strongly Disagree	Disagree	Strongly Disagree	Strongly Disagree	Agree	Agree	Disagree	Strongly Disagree	Disagree	Strongly Disagree	Strongly Disagree	Nothing	Not much
Student 7	4	3	3	5	3	2	Agree	Neutral	Agree	Disagree	Disagree	Neutral	Disagree	Strongly Agree	Agree	Agree	Strongly Disagree	Disagree	Strongly Disagree	Strongly Disagree	Not much	A Little	8	Prefer to self-describe	8
Student 8	4	4	3	4	4	3	Strongly Agree	Strongly Agree	Agree	Neutral	Disagree	Neutral	Disagree	Strongly Agree	Strongly Agree	Strongly Agree	Agree	Neutral	Agree	Disagree	A Little	A lot	8	Female	8
Student 9	3	3	3	5	5	4	Agree	Agree	Neutral	Neutral	Agree	Neutral	Neutral	Agree	Agree	Agree	Neutral	Agree	Neutral	Neutral	A Little	A lot	8	Male	8
Student 10	3	3	3	3	3	3	Neutral	Neutral	Neutral	Neutral	Neutral	Neutral	Neutral	Neutral	Neutral	Neutral	Neutral	Neutral	Neutral	Neutral	A Little	A Little	8	Female	8
Student 11	4	5	5	6	5	5	Strongly Agree	Strongly Agree	Strongly Agree	Agree	Agree	Agree	Neutral	Strongly Agree	Strongly Agree	Strongly Agree	Strongly Agree	Strongly Agree	Strongly Agree	Agree	A Little	A lot	8	Male	8
Student 12	1	3	3	4	4	4	Agree	Strongly Agree	Strongly Agree	Disagree	Neutral	Strongly Agree	Strongly Disagree	Strongly Agree	Strongly Agree	Strongly Agree	Disagree	Agree	Neutral	Strongly Disagree	A lot	A lot	8	Prefer not to say	8
Student 13	3	3	3	4	5	5	Agree	Neutral	Agree	Disagree	Neutral	Disagree	Strongly Disagree	Strongly Agree	Agree	Agree	Disagree	Agree	Disagree	Strongly Disagree	A Little	A Little
Student 14	3	2	3	3	2	1	Strongly Agree	Agree	Neutral	Strongly Disagree	Neutral	Disagree	Strongly Disagree	Agree	Neutral	Neutral	Disagree	Neutral	Strongly Disagree	Strongly Disagree	A Little	A Little	10	Prefer to self-describe	10
Student 15	3	3	4	5	4	4	Agree	Agree	Neutral	Neutral	Disagree	Neutral	Disagree	Agree	Agree	Neutral	Agree	Neutral	Agree	Disagree	Not much	A Little	8	Female	8
Student 16	1	2	1	4	3	4	Agree	Agree	Disagree	Strongly Disagree	Disagree	Strongly Disagree	Strongly Disagree	Agree	Agree	Agree	Neutral	Neutral	Agree	Disagree	Not much	A Little	8	Female	8
Student 17	2	3	3	4	3	5	Agree	Agree	Agree	Neutral	Strongly Disagree	Strongly Disagree	Strongly Disagree	Agree	Agree	Neutral	Strongly Agree	Strongly Disagree	Strongly Disagree	Strongly Disagree	Nothing	Not much	8	Male	8
Student 18	3	2	3	3	3	4	Strongly Agree	Strongly Agree	Strongly Agree	Neutral	Neutral	Agree	Strongly Disagree	Strongly Agree	Strongly Agree	Strongly Agree	Agree	Agree	Agree	Disagree	A Little	A lot
Student 19	5	3	3	6	4	4	Strongly Agree	Agree	Strongly Agree	Neutral	Disagree	Neutral	Disagree	Agree	Agree	Strongly Agree	Neutral	Neutral	Neutral	Disagree	A Little	A lot	8	Prefer not to say	8
Student 20	4	3	3	5	5	4	Strongly Agree	Strongly Agree	Agree	Neutral	Neutral	Neutral	Disagree	Strongly Agree	Strongly Agree	Strongly Agree	Agree	Agree	Agree	Disagree	A Little	A lot	10	Prefer not to say	10
Student 21	4	5	2	5	6	3	Strongly Agree	Strongly Agree	Strongly Agree	Agree	Neutral	Agree	Neutral	Strongly Agree	Strongly Agree	Strongly Agree	Strongly Agree	Agree	Strongly Agree	Agree	A Little	A lot	8	Female	8
Student 22	6	4	5	6	6	5	Strongly Agree	Strongly Agree	Neutral	Neutral	Disagree	Neutral	Disagree	Strongly Agree	Strongly Agree	Strongly Agree	Agree	Neutral	Agree	Agree	A Little	A lot	8	Male	8
Student 23	2	2	4	5	4	2	Strongly Agree	Neutral	Disagree	Disagree	Neutral	Strongly Disagree	Strongly Disagree	Strongly Agree	Agree	Strongly Agree	Neutral	Agree	Neutral	Disagree	A Little	A lot
Student 24	3	3	3	3	3	4	Strongly Agree	Agree	Neutral	Disagree	Strongly Disagree	Neutral	Disagree	Strongly Agree	Strongly Agree	Agree	Agree	Neutral	Neutral	Neutral	A lot	A Little	8	Male	8
Student 25	3	3	1	3	3	3	Strongly Agree	Strongly Agree	Agree	Neutral	Neutral	Neutral	Neutral	Strongly Agree	Strongly Agree	Disagree	Strongly Disagree	Disagree	Disagree	Disagree	A Little	A Little	10	Male	10
Student 26	4	5	3	6	6	6	Strongly Agree	Strongly Agree	Strongly Agree	Strongly Agree	Neutral	Agree	Disagree	Strongly Agree	Strongly Agree	Strongly Agree	Strongly Agree	Agree	Agree	Neutral	A Little	A lot
Student 27	2	3	1	3	3	2	Agree	Agree	Neutral	Disagree	Strongly Disagree	Disagree	Disagree	Strongly Agree	Strongly Agree	Neutral	Disagree	Neutral	Neutral	Disagree	A Little	A Little
Student 28	6	5	4	5	5	4	Agree	Agree	Agree	Agree	Agree	Agree	Agree	Agree	Agree	Agree	Agree	Agree	Agree	Agree	A Little	A lot	8	Female	8
Student 29	2	5	2	6	6	6	Strongly Agree	Strongly Agree	Strongly Agree	Neutral	Neutral	Agree	Neutral	Strongly Agree	Strongly Agree	Strongly Agree	Strongly Agree	Strongly Agree	Strongly Agree	Strongly Agree	A Little	A lot	8	Female	8
Student 30	6	6	5	6	6	5	Strongly Agree	Strongly Agree	Agree	Strongly Agree	Agree	Strongly Agree	Agree	Strongly Agree	Strongly Agree	Agree	Strongly Agree	Agree	Strongly Agree	Agree	A lot	A lot	8	Male,Non-binary,Female,Prefer not to say,Prefer to self-describe	8
Student 31	3	3	3	3	1	1	Strongly Agree	Agree	Neutral	Agree	Strongly Agree	Strongly Disagree		Strongly Agree	Strongly Agree	Neutral	Disagree	Strongly Agree		Strongly Agree	Not much	A Little	7	Female,Prefer not to say,Prefer to self-describe	7
Student 32	4	3	3	4	4	3	Strongly Agree	Agree	Neutral	Disagree	Strongly Disagree	Disagree	Strongly Disagree	Strongly Agree	Agree	Agree	Neutral	Neutral	Disagree	Strongly Disagree	A Little	A lot	8	Female	8
Student 33	3	4	4	3	4	4	Agree	Agree	Agree	Disagree	Disagree	Disagree	Disagree	Agree	Agree	Agree	Disagree	Disagree	Disagree	Disagree	A lot	A lot	8	Female	8
Student 34	1	1	1	4	3	3	Neutral	Neutral	Neutral	Neutral	Neutral	Neutral	Neutral	Neutral	Neutral	Neutral	Neutral	Neutral	Neutral	Neutral	Nothing	A Little	8	Female	8
Student 35	2	3	2	4	4	3	Strongly Agree	Strongly Agree	Neutral	Neutral	Strongly Disagree	Neutral	Neutral	Strongly Agree	Strongly Agree	Agree	Agree	Neutral	Neutral	Neutral	A Little	A lot	8	Male	8
Student 36	1	1	1	5	4	2	Agree	Neutral	Neutral	Strongly Disagree	Strongly Disagree	Disagree	Strongly Disagree	Agree	Neutral	Agree	Disagree	Neutral	Neutral	Neutral	A lot	Everything
Student 37	3	3	3	3	3	3	Strongly Agree	Strongly Agree	Strongly Agree	Disagree	Disagree	Disagree	Strongly Disagree	Strongly Agree	Strongly Agree	Strongly Agree	Neutral	Neutral	Neutral	Strongly Disagree	A Little	A lot	8	Male	8
Student 38	3	3	3	4	2	3	Strongly Agree	Strongly Agree	Agree	Agree	Neutral	Neutral	Agree	Strongly Agree	Strongly Agree	Strongly Agree	Agree	Agree	Agree	Neutral	Not much	Not much	7		7
Student 39	4	4	4	4	4	4	Agree	Strongly Agree	Agree	Neutral	Disagree	Disagree	Agree	Strongly Agree	Strongly Agree	Strongly Agree	Agree	Neutral	Neutral	Agree	A Little	A lot	8	Male	8
Student 40	6	6	4	6	6	5	Strongly Agree	Strongly Agree	Strongly Agree	Strongly Agree	Neutral	Disagree	Disagree	Strongly Agree	Strongly Agree	Strongly Agree	Strongly Agree	Agree	Disagree	Disagree	A Little	A lot	8	Female	8
Student 41	1	1	1	2	3	4	Strongly Agree	Neutral	Strongly Disagree	Strongly Disagree	Agree	Strongly Disagree	Strongly Disagree	Strongly Agree	Agree	Agree	Neutral	Agree	Disagree	Strongly Disagree	A lot	A lot
Student 42	1	2	1	2	3	1	Agree	Agree	Neutral	Strongly Disagree	Disagree	Strongly Disagree	Strongly Disagree	Agree	Agree	Neutral	Strongly Disagree	Disagree	Strongly Disagree	Strongly Disagree	A Little	A Little	8	Male	8
Student 43	3	6	4	4	6	5	Strongly Agree	Strongly Agree	Agree	Neutral	Strongly Agree	Disagree	Disagree	Strongly Agree	Strongly Agree	Strongly Agree	Neutral	Strongly Agree	Neutral	Strongly Disagree	A lot	A lot
Student 44	3	4	5	4	3	5	Strongly Agree	Agree	Neutral	Neutral	Disagree	Agree	Agree	Strongly Agree	Strongly Agree	Agree	Agree	Agree	Agree	Strongly Agree	A Little	A lot
Student 45	3	3	3	4	4	4	Disagree	Disagree	Disagree	Disagree	Disagree	Disagree	Strongly Disagree	Agree	Agree	Agree	Agree	Agree	Agree	Strongly Disagree	Nothing	Not much	8	Male	8
Student 46	2	1	1	6	6	6	Strongly Agree	Strongly Agree	Strongly Agree	Neutral	Agree	Disagree	Disagree	Strongly Agree	Strongly Agree	Strongly Agree	Strongly Agree	Strongly Agree	Neutral	Neutral	A Little	Everything	8	Male	8
Student 47	3	4	3	4	4	4	Agree	Strongly Agree	Strongly Agree	Neutral	Neutral	Neutral	Disagree	Strongly Agree	Strongly Agree	Strongly Agree	Neutral	Neutral	Agree	Disagree	A Little	A lot	8	Female	8
Student 48	4	4	3	5	5	4	Strongly Agree	Agree	Strongly Agree	Neutral	Disagree	Strongly Disagree	Strongly Disagree	Strongly Agree	Agree	Strongly Agree	Agree	Neutral	Disagree	Disagree	A Little	A lot	8	Male	8
Student 49	4	5	4	4	5	5	Strongly Agree	Strongly Agree	Strongly Agree	Agree	Agree	Neutral	Disagree	Strongly Agree	Strongly Agree	Strongly Agree	Agree	Agree	Neutral	Disagree	A lot	A lot	8	Female	8
Student 50	3	3	3	4	4	4	Strongly Agree	Agree	Neutral	Agree	Neutral	Disagree	Strongly Disagree	Strongly Agree	Strongly Agree	Agree	Strongly Agree	Agree	Agree	Neutral	A Little	A Little	8	Female	8
Student 51	4	4	4	4	4	4	Strongly Agree	Strongly Agree	Strongly Agree	Neutral	Neutral	Agree	Neutral	Strongly Agree	Strongly Agree	Strongly Agree	Agree	Agree	Neutral	Neutral	A Little	A lot	8	Female	8
Student 52	1	1	1	1	1	1	Strongly Agree	Strongly Agree	Agree	Disagree	Neutral	Disagree	Disagree	Strongly Disagree	Strongly Disagree	Agree	Disagree	Neutral	Disagree	Disagree	A Little	A lot	8	Female	8
Student 53	4	4	5	4	4	4	Strongly Agree	Strongly Agree	Strongly Agree	Neutral	Neutral	Neutral	Disagree	Strongly Agree	Strongly Agree	Strongly Agree	Neutral	Neutral	Neutral	Disagree	A Little	A lot	8	Male	8
Student 54	6	5	5	5	4	5	Strongly Agree	Strongly Agree	Strongly Agree	Agree	Neutral	Agree	Disagree	Strongly Agree	Strongly Agree	Strongly Agree	Neutral	Agree	Neutral	Strongly Disagree	A Little	A Little	8	Female	8
Student 55	6	6	4	6	6	6	Agree	Disagree	Agree	Agree	Disagree	Neutral	Strongly Disagree	Strongly Agree	Strongly Agree	Strongly Agree	Strongly Agree	Agree	Strongly Agree	Neutral	Not much	A lot	5	Female	5
Student 56	5	4	4	3	3	3	Strongly Agree	Strongly Agree	Neutral	Strongly Disagree	Disagree	Disagree	Strongly Disagree	Strongly Agree	Strongly Agree	Neutral	Strongly Disagree	Neutral	Disagree	Strongly Disagree	Not much	A Little	8	Male	8
Student 57	5	6	4	5	6	4	Agree	Neutral	Disagree	Strongly Agree	Neutral	Agree	Agree	Strongly Agree	Agree	Agree	Strongly Agree	Agree	Strongly Agree	Agree	A Little	A lot
Student 58	1	1	1	1	1	1	Neutral	Neutral	Neutral	Neutral	Neutral	Neutral	Neutral	Neutral	Neutral	Neutral	Neutral	Neutral	Neutral	Neutral	Nothing	Nothing	8	Male	8
Student 59	6	6	5	6	6	6	Strongly Agree	Strongly Agree	Strongly Agree	Strongly Agree	Strongly Agree	Strongly Agree	Strongly Agree	Strongly Agree	Strongly Agree	Strongly Agree	Strongly Agree	Strongly Agree	Strongly Agree	Strongly Agree	A lot	Everything	12	Male	12
Student 60	3	2	1	1	2	2	Agree	Agree	Agree	Neutral	Neutral	Disagree	Strongly Disagree	Agree	Agree	Agree	Neutral	Neutral	Disagree	Strongly Disagree	A Little	A Little	8	Female	8
Student 61	1	2	3	1	6	3	Strongly Agree	Disagree	Disagree	Disagree	Strongly Disagree	Neutral	Disagree	Neutral		Disagree	Neutral	Agree	Neutral	Neutral	A Little	A Little	12	Female	12
Student 62	1	2	1	1	3	2	Agree	Agree	Neutral	Strongly Disagree	Strongly Disagree	Strongly Disagree	Strongly Disagree	Agree	Agree	Neutral	Strongly Disagree	Strongly Disagree	Strongly Disagree	Strongly Disagree	A Little	A Little	8	Female	8
Student 63	4	3	2	5	5	5	Agree	Agree	Agree	Neutral	Neutral	Neutral	Disagree	Agree	Agree	Agree	Agree	Agree	Strongly Disagree	Strongly Disagree	A Little	A lot	8	Female	8
Student 64	3	5	6	5	6	6	Strongly Agree	Strongly Agree	Agree	Neutral	Agree	Agree	Agree	Strongly Agree	Strongly Agree	Agree	Neutral	Agree	Agree	Agree	Not much	A lot	12	Male,Prefer to self-describe	12
Student 65	5	4	4	5	4	3	Strongly Agree	Agree	Agree	Agree	Neutral	Strongly Disagree	Agree	Strongly Agree	Strongly Agree	Strongly Agree	Agree	Strongly Agree	Agree	Agree	A Little	A lot	7	Male	7
Student 66	3	2	3	5	4	3	Strongly Agree	Strongly Agree	Agree	Disagree	Strongly Disagree	Neutral	Disagree	Strongly Agree	Strongly Agree	Strongly Agree	Disagree	Disagree	Neutral	Disagree	A Little	A lot
Student 67	6	3	5	6	6	6	Strongly Agree	Strongly Agree	Neutral	Agree	Neutral	Neutral	Disagree	Strongly Agree	Strongly Agree	Strongly Agree	Strongly Agree	Agree	Agree		A Little	A lot	5	Female	5
Student 68	3	2	3	4	4	4	Agree	Agree	Neutral	Strongly Disagree	Strongly Disagree	Strongly Disagree	Strongly Disagree	Strongly Agree	Strongly Agree	Strongly Agree	Neutral	Neutral	Neutral	Disagree	A Little	A lot	8	Non-binary	8
Student 69	5	5	4	5	6	5	Agree	Strongly Agree	Agree	Agree	Neutral	Neutral	Disagree	Strongly Agree	Strongly Agree	Agree	Strongly Agree	Agree	Neutral	Neutral	A lot	A lot	11	Prefer not to say	11
Student 70	2	2	3	2	3	3	Strongly Agree	Strongly Agree	Strongly Agree	Disagree	Neutral	Disagree	Strongly Disagree	Strongly Agree	Strongly Agree	Strongly Agree	Disagree	Neutral	Disagree	Strongly Disagree	A Little	A Little	8	Female	8
Student 71	3	3	3	4	4	4	Strongly Agree	Agree	Neutral	Agree	Neutral	Disagree	Strongly Disagree	Strongly Agree	Strongly Agree	Agree	Strongly Agree	Strongly Agree	Strongly Agree	Disagree	Nothing	A Little	8	Prefer not to say	8
Student 72	5	4	2	4	3	5	Strongly Agree	Agree	Strongly Agree	Disagree	Neutral	Strongly Agree	Neutral	Agree	Neutral	Strongly Agree	Agree	Agree	Agree	Strongly Agree	Not much	Everything	7	Female	7
Student 73	2	2	1	4	3	4	Strongly Agree	Strongly Agree	Neutral	Strongly Disagree	Disagree	Strongly Disagree	Strongly Disagree	Strongly Agree	Strongly Agree	Agree	Neutral	Neutral	Disagree	Disagree	A Little	A lot	8	Female	8
Student 74	4	4	3	5	5	3	Strongly Agree	Agree	Strongly Agree	Neutral	Neutral	Disagree	Neutral	Strongly Agree	Strongly Agree	Strongly Agree	Neutral	Neutral	Disagree	Disagree	A lot	A lot
Student 75	3	3	3	3	3	3	Neutral	Neutral	Neutral	Neutral	Neutral	Neutral	Neutral	Neutral	Neutral	Neutral	Neutral	Neutral	Neutral	Neutral	A Little	A Little	8	Male	8
Student 76	1	1	1	6	6	6	Strongly Agree	Agree	Neutral	Disagree	Strongly Disagree	Neutral	Disagree	Strongly Agree	Agree	Agree	Agree	Disagree	Agree	Disagree	Everything	Everything	10	Prefer to self-describe	10
Student 77	3	3	3	4	4	4	Strongly Agree	Strongly Agree	Agree	Neutral	Neutral	Neutral	Strongly Disagree	Strongly Agree	Strongly Agree	Strongly Agree	Agree	Agree	Agree	Neutral	A Little	A lot	7	Male	7
Student 78	5	4	4	5	4	4	Strongly Agree	Strongly Agree	Strongly Agree	Neutral	Neutral	Neutral	Agree	Strongly Agree	Strongly Agree	Strongly Agree	Neutral	Neutral	Neutral	Agree	A lot	A lot
Student 79	3	3	2	3	3	2	Agree	Neutral	Neutral	Neutral	Neutral	Neutral	Neutral	Agree	Neutral	Neutral	Neutral	Neutral	Neutral	Neutral	A lot	A lot
Student 80	3	5	4	5	5	4	Strongly Agree	Strongly Agree	Neutral	Neutral	Agree	Neutral	Disagree	Strongly Agree	Strongly Agree	Agree	Agree	Agree	Agree	Disagree	A Little	A lot
Student 81	2	5	1	2	5	1	Strongly Agree	Strongly Agree	Agree	Neutral	Agree	Agree	Disagree	Strongly Agree	Strongly Agree	Strongly Agree	Neutral	Neutral	Neutral	Disagree	A lot	A lot	8	Male	8
Student 82	3	4	2	4	4	4	Strongly Agree	Strongly Agree	Agree	Neutral	Neutral	Disagree	Strongly Disagree	Strongly Agree	Strongly Agree	Agree	Agree	Agree	Neutral	Disagree	A Little	A lot	12	Female	12
Student 83	3	3	3	4	4	4	Neutral	Agree	Neutral	Agree	Neutral	Neutral	Strongly Disagree	Strongly Agree	Strongly Agree	Agree	Strongly Agree	Agree	Strongly Agree	Strongly Disagree	A Little	A Little	8	Male	8
