# Supplementary material for: Rocks Really Rock: electronic field trips via Web Google Earth can generate positive impacts in attitudes toward Earth sciences in middle- and high-school students
Source: Copernicus journal article supplement (doi:10.5194/gc-7-101-2024), 2024-05-02
Supplement: Supplementary file 3 [file S3. Teachers Survey.docx]

Final TEACHERS Rocks Really Rock Post-Survey Assessment-Teachers

Start of Block: Block 2

Consent Participant Informed Consent
Please read this document carefully before you decide to participate in this research study.

Your participation is voluntary, and you can decline to participate, or withdraw consent at any time, with no consequences.

Study Title: Impacts of Google Earth Field Trips on K-12 Students’ Geology Literacy and Geology careers' interest

Persons conducting the research:
Carolina Ortiz Guerrero, PhD Student in the Department of Geological Sciences at the University of Florida, cortizguerrero@ufl.edu (352) 2782857, Williamson Hall 216
 Dr. Jamie Loizzo, Assistant Professor of Agricultural Communication, Department of Agricultural Education and Communication, jloizzo@ufl.edu, (352) 273-1663, Bryant 121D.

Purpose of the research study: The purpose of this study is to examine your experiences as a teacher implementing a Google Earth electronic field trip featuring Geology concepts with youth in your classroom/after school program.

What you will be asked to do in the study: You will be asked to participate in written survey after the electronic field trip.

Time required: 10-minutes to complete the post-survey.

Risks and Benefits: There are no direct benefits to you in participating in this study. However, your participation could provide insights for future elecronic field trips could be better designed and implemented in middle/high school and after school programs. Results could impact the ongoing development of the Streaming Science project. One risk of this study could be a breach of confidentiality, which is addressed in the below confidentiality section.

Compensation: There is no compensation for participating in this research.
Confidentiality: Your identity will remain confidential. We will not collect your name in the research survey. Research results will remain anonymous and only demographic information will be reported in research presentations and publications from this study. Your individual survey responses will not be shared outside of our research team.

Voluntary participation: Your participation in this study is completely voluntary. Right to withdraw from the study: You have the right to withdraw from the study at anytime without consequence.

Questions about the study: If you wish to discuss the information above or any discomforts you may experience, please ask questions now or contact one of the research team members listed at the top of this form.

If you have any questions regarding your rights as a research subject, please contact the Institutional Review Board (IRB02) office (University of Florida; PO Box 100173; Gainesville, FL 32610; (352) 392-0433 or irb2@ufl.edu.)

Agreement: I have read the procedure described above. I voluntarily agree to participate in the procedure and I have received a copy of this description.

- Participant's Name (1) __________________________________________________
- Participant's Signature (2) __________________________________________________
- Date (3) __________________________________________________

End of Block: Block 2

Start of Block: Teacher's survey

Q1


Please rate the following statements in terms of how much you agree.

|  | Strongly agree (1) | Somewhat agree (2) | Neither agree nor disagree (3) | Somewhat disagree (4) | Strongly disagree (5) |
| --- | --- | --- | --- | --- | --- |
|  |  |  |  |  |  |
|  |  |  |  |  |  |
| The scientist was interesting (18) |  |  |  |  |  |
| The scientist talked about something I did not already know (11) |  |  |  |  |  |
| The scientist communicated at a level that I understood (12) |  |  |  |  |  |
| The scientist gave an interesting demonstration to explain the origin of rocks (13) |  |  |  |  |  |
| The scientist was knowledgeable about the topic (7) |  |  |  |  |  |
| It is important that we learn about Earth's history (14) |  |  |  |  |  |
| I learned about careers in geology from the scientist (15) |  |  |  |  |  |
| The electronic field trip was easy to hear (16) |  |  |  |  |  |
| I would recommend this electronic field trip to other classes (17) |  |  |  |  |  |

Q2

Please rate the following statements in terms of how much you agree.

|  | Strongly agree (1) | Somewhat agree (2) | Neither agree nor disagree (3) | Somewhat disagree (4) | Strongly disagree (5) |
| --- | --- | --- | --- | --- | --- |
| The virtual tour inspired my students to ask questions about geology (6) |  |  |  |  |  |
| The virtual tour inspired my students to want to learn more about careers in geology (11) |  |  |  |  |  |
|  |  |  |  |  |  |

| Page Break |  |
| --- | --- |

Q3 Please leave a comment about what went well and didn’t go well by using the EFT. If you have any suggestions for improving the program, write them below.

________________________________________________________________

________________________________________________________________

________________________________________________________________

________________________________________________________________

________________________________________________________________

End of Block: Teacher's survey

Start of Block: Teachers Demographics
