# Supplementary material for: Rocks Really Rock: electronic field trips via Web Google Earth can generate positive impacts in attitudes toward Earth sciences in middle- and high-school students
Source: Copernicus journal article supplement (doi:10.5194/gc-7-101-2024), 2024-05-02
Supplement: Supplementary file 4 [file S4. Valid teachers survey answers.xlsx]

## Sheet: Hoja1
Respondent ID	The topic was interesting	The scientist was interesting	The scientist talked about something I did not already know	The scientist communicated at a level that I understood	The scientist was knowledgeable about the topic	The scientist gave an interesting demonstration to explain the origin of rocks	It is important that we learn about Earth's history	I learned about careers in geology from the scientist	I would recommend this electronic field trip to other classes	My students were engaged with the virtual tour	The virtual tour insprided my students to ask questions about geology	The virtual tour inspired my students to want to learn more about careers in geology	The electronic field trip was easy to hear	Please leave a comment about what went well and didn’t go well by using the EFT. If you have any suggestions for improving the program, write them below.	Demographics - Selected Choice	What grade do you teach in (select one)?
2	5	4	4	5	5	5	4	4	4	4	4	3	5	It is best to share the EFT as whole class. Using ipads or chromebooks has issues with school wifi. It would be neat to have a live virtual EFT.	Female	8
3	5	5	5	5	5	5	5	5	5	5	4	4	5	They EFT went well because we could complete it at our pace. I could go to the places on the map that my students wanted to look at.	Female	5
4	5	5	5	5	5	4	5	5	5	4	4	4	5	I enjoyed the multiple sites. The camera and mic quality were great. The conversation was a little stiff and could use a second scientist to conversate with.	Female	11
5	5	5	5	5	5	5	5	3	5	4	3	3	5	No problems with using the link or the videos. The sound quality when outdoors was sometimes a little difficult to hear/understand due to the wind. The indoor recording had echo. I presented the EFT on a SmartBoard so all students could watch. I teach in a very tiny district - approx. 100 students preK thru 12th grade. I am the only science teacher, so I teach 7-12th. Your question at the end abo…	Female	8
6	5	5	3	5	5	5	5	4	5	4	4	3	4	The students liked seeing the rocks in their natural habitat. When we visit again, I will create a work sheet for the students to take notes during the presentation and another to sun up what they have learned. A link to more information would be helpful too. Some of the students commented that the volume changed and that you could hear the wind. A fluffy microphone might help with that. Overall,…	Female	7
7	4	5	4	5	4	2	5	4	4	2	4	2	2	Using EFT was very easy and instructions were clear in how to navigate through it and what to do to prepare and send opt-out options for parents. Some of the information was hard to hear with the way some of the videos were recorded.	Female	8
	4.83333	4.83333	4.33333	5	4.83333	4.33333	4.83333	4.16667	4.66667	3.83333	3.83333	3.16667	4.33333
	0.408248	0.408248	0.816497	0	0.408248	1.21106	0.408248	0.752773	0.516398	0.983192	0.408248	0.752773	1.21106
